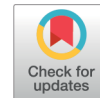

# Association of Patient Characteristics, Diabetes, BMI, and Obesity With Severe COVID-19 in Metropolitan Detroit, MI

Jaspreet Hehar,<sup>1</sup> Erika Todter,<sup>2</sup> and Sharon W. Lahiri<sup>1</sup>

Identification of specific risk factors for severe coronavirus disease 2019 (COVID-19) is crucial for prevention of poor outcomes and mortality. This retrospective cohort study of patients hospitalized with COVID-19 demonstrated that older age, male sex, Black race, diabetes, elevated BMI, and elevated inflammatory markers were correlated with critical illness in COVID-19. Older age, male sex, diabetes, and inflammatory markers, but not elevated BMI, were associated with mortality. Despite having greater odds of critical illness, Black patients had lower odds of death than White patients. Older age, male sex, diabetes, and elevated inflammatory markers were significantly associated with venous thromboembolism. These findings suggest a need to aggressively identify and manage modifiable risk factors (i.e., diabetes and elevated BMI) and encourage vaccination of at-risk individuals to prevent poor outcomes from COVID-19.

The coronavirus disease 2019 (COVID-19) pandemic has tragically claimed millions of lives, profoundly affected well-being, and resulted in dramatic social and economic disruption. The state of Michigan has been deeply affected by COVID-19, having led the nation in the number of new infections and being the only state categorized as at a “severe” risk level in April 2021 (1). The estimated total cost from COVID-19 is >\$16 trillion, with approximately half of that cost resulting from lost income from the COVID-19–induced recession and the rest from loss of health (2).

Although >94% of individuals survive infection with severe acute respiratory syndrome coronavirus 2 (SARS-CoV-2) (3), severe disease and death can occur, especially in individuals who are older, male, and have comorbid conditions (4). Furthermore,

persistent “long-haul” symptoms have been reported among COVID-19 survivors, even in those who experienced an initial mild acute illness (5). The high likelihood of SARS-CoV-2 becoming endemic, lack of a cure, and possibility of severe disease, death, and long-term morbidity from illness reinforce the need to identify risk factors for poor outcomes from COVID-19.

The Henry Ford Health System (HFHS), a comprehensive, integrated, nonprofit health care organization that includes five hospitals in metropolitan Detroit, MI, provides a unique patient population to study risk factors for severe COVID-19. A significant portion of patients seen at HFHS comes from Detroit, which is the location of the 877-bed flagship hospital.

The aims of our study were to determine the incidence of severe outcomes (i.e., need for mechanical ventilation [MV], intensive care unit [ICU] admission, death, and venous thromboembolism [VTE]) in patients admitted for COVID-19 within a single health system, describe the clinical characteristics of these patients, and evaluate the correlation of poor outcomes with demographics, diabetes, BMI, obesity, and levels of inflammatory markers. Additionally, to identify potential risk factors that are unique to our patient population, we compared patient characteristics and the presence of multiple comorbidities in Black and White patients with COVID-19. Determination of risk factors associated with severe COVID-19, especially in a unique population with a large percentage of Black patients, can guide risk mitigation efforts and help to identify racial gaps in health care.

<sup>1</sup>Department of Internal Medicine, Division of Endocrinology, Diabetes, Bone and Mineral Disorders, Henry Ford Health System, Detroit, MI;

<sup>2</sup>Department of Public Health Sciences, Henry Ford Health System, Detroit, MI

Corresponding author: Sharon W. Lahiri, slahiri1@hfhs.org

<https://doi.org/10.2337/cd21-0065>

©2022 by the American Diabetes Association. Readers may use this article as long as the work is properly cited, the use is educational and not for profit, and the work is not altered. More information is available at <https://www.diabetesjournals.org/journals/pages/license>.

## Research Design and Methods

### Study Design and Participants

This was a retrospective study of electronic medical records (EMRs) of adult patients ( $\geq 18$  years of age) who were admitted to any of the five hospitals in the HFHS (Henry Ford Hospital in Detroit, Henry Ford West Bloomfield Hospital, Henry Ford Macomb Hospital, Henry Ford Wyandotte Hospital, and Henry Ford Allegiance Health in Jackson, MI) and were diagnosed with COVID-19 by real-time PCR between 1 March and 25 July 2020. Polymerase chain reaction testing was validated and performed on four platforms (NeumoDx 288, Cepheid GeneXpert and Infinity, Hologic Panther, and Diasorin Liaison MDX).

This study was approved by the HFHS's institutional review board. The need for informed consent was waived because this was a retrospective chart review with minimal risk and no intervention.

### Data Collection

Demographic, clinical, laboratory, and outcome data were extracted from EMRs. These included age, sex, race (described as Black or White in the EMRs), BMI, A1C, and the presence of comorbidities, including diabetes, hypertension, chronic kidney disease (CKD), sleep apnea, chronic obstructive pulmonary disease (COPD), coronary artery disease (CAD), stroke, heart failure (HF), cirrhosis, HIV infection, and active malignancy. Additionally, the inflammatory markers D-dimer, ferritin, C-reactive protein (CRP), interleukin 6 (IL-6), and procalcitonin were collected. Primary outcomes evaluated were the need for MV, need for ICU admission, death, and development of VTE.

### Statistical Analysis

Descriptive statistics were used to describe patient demographics, clinical characteristics, and multiple outcomes. Obese, overweight, and at least overweight were defined as BMI  $\geq 30.0$ , 25.0–29.99, and  $\geq 25.0$  kg/m<sup>2</sup>, respectively. We compared the incidence of comorbid conditions in Black and White patients who had confirmed COVID-19. The average value was used for cases in which patients had multiple BMI or A1C values during their admission. Two-group comparisons using  $\chi^2$  tests and Fisher's exact test (when counts were  $< 5$ ) assessed correlation of race with comorbidities and outcomes.

Multivariate logistic regression models were used to determine whether demographics, A1C  $> 5.7\%$ ,

diabetes, elevated BMI categories, or inflammatory markers (D-dimer, ferritin, CRP, IL-6, and procalcitonin) were significantly associated with the four outcomes. Each analysis controlled for the confounders of age, sex, race, diabetes, BMI, and eight additional comorbidities (hypertension, CKD, CAD, stroke, HF, COPD, sleep apnea, and active malignancy). The analyses for A1C  $> 5.7\%$  were controlled for all previously mentioned confounding variables except diabetes. For the BMI categories, multivariate logistic regression models were used to measure the effects of BMI  $\geq 30.0$ ,  $\geq 25.0$ , and  $\geq 30.0$  vs. 25.0–29.99 kg/m<sup>2</sup> on each outcome. In cases with multiple values for the same inflammatory marker during the hospital stay, the earliest value was used. If the inflammatory marker was measured multiple times on the earliest day, then the average value on the earliest day was used. Statistical significance was determined if  $P < 0.05$ . All analyses were performed using SAS 9.4 software (SAS Institute, Cary, NC).

## Results

### Overall Characteristics and Main Outcomes

A total of 8,751 adults hospitalized with COVID-19 between 1 March and 25 July 2020 were included in this cohort study, of whom 682 (7.8%) required MV, 867 (9.9%) were admitted to the ICU, 753 (8.6%) died, and 430 (4.9%) were diagnosed with VTE. Of these patients, 4,447 (50.8%) were Black, 4,951 (56.6%) were women, and 5,152 (58.9%) were  $> 50$  years of age. Of the patients who had BMI recorded, 2,560 (50.3%) had a BMI  $\geq 30.0$  kg/m<sup>2</sup>, 1,397 (27.5%) had a BMI of 25.0–29.99 kg/m<sup>2</sup>, and 3,957 (77.8%) had a BMI  $\geq 25.0$  kg/m<sup>2</sup>. Of the patients who had A1C checked, 1,138 (74.3%) had an A1C  $> 5.7\%$ . Diabetes and hypertension were the most frequent comorbidities (2,068 [23.6%] had diabetes and 1,164 [13.3%] had hypertension). Fewer than 10% had the following comorbidities: CKD in 400 (4.6%), sleep apnea in 125 (1.4%), COPD in 155 (1.8%), CAD in 321 (3.7%), stroke in 100 (1.1%), HF in 310 (3.5%), and malignancy in 300 (3.4%) patients. Fewer than 1% of patients had cirrhosis ( $n = 35$  [0.4%]) or HIV diagnosis ( $n = 11$  [0.1%]). All descriptive data are listed in Table 1.

### Association of Demographics and Comorbidities With Race

Our data suggested a significant association between race (categorized as Black or White) and having multiple comorbid conditions (diabetes, hypertension, CKD, sleep apnea, COPD, CAD, and cirrhosis), an A1C

**TABLE 1** Patient Characteristics and Main Outcomes of Patients With COVID-19 (N = 8,751)

| Demographics                                       |               |
|----------------------------------------------------|---------------|
| Race                                               |               |
| Black                                              | 4,447 (50.82) |
| White                                              | 3,048 (34.83) |
| Other                                              | 1,256 (14.35) |
| Sex                                                |               |
| Male                                               | 3,800 (43.42) |
| Female                                             | 4,951 (56.58) |
| Age, years                                         |               |
| 18–29                                              | 968 (11.06)   |
| 30–39                                              | 1,227 (14.02) |
| 40–49                                              | 1,404 (16.04) |
| 50–59                                              | 1,745 (19.94) |
| 60–69                                              | 1,541 (17.61) |
| ≥70                                                | 1,866 (21.32) |
| Clinical variables                                 |               |
| Diabetes                                           | 2,068 (23.63) |
| Hypertension                                       | 1,164 (13.30) |
| CKD                                                | 400 (4.57)    |
| Sleep apnea                                        | 125 (1.43)    |
| COPD                                               | 155 (1.77)    |
| CAD                                                | 321 (3.67)    |
| Stroke                                             | 100 (1.14)    |
| HF                                                 | 310 (3.54)    |
| Cirrhosis                                          | 35 (0.40)     |
| HIV                                                | 11 (0.13)     |
| Active malignancy                                  | 300 (3.43)    |
| Weight status (n = 5,088)                          |               |
| Obesity (BMI ≥30.0 kg/m <sup>2</sup> )             | 2,560 (50.31) |
| Overweight (BMI 25.0–29.99 kg/m <sup>2</sup> )     | 1,397 (27.46) |
| At least overweight (BMI ≥25.0 kg/m <sup>2</sup> ) | 3,957 (77.77) |
| A1C >5.7% (n = 1,532)                              | 1,138 (74.28) |
| Outcomes                                           |               |
| MV                                                 | 682 (7.8)     |
| ICU admission                                      | 867 (9.9)     |
| VTE                                                | 430 (4.9)     |
| Death                                              | 753 (8.6)     |

Data are n (%).

>5.7%, a BMI ≥25.0 kg/m<sup>2</sup>, and a BMI ≥30.0 kg/m<sup>2</sup> in patients with COVID-19. Comparison of Black and White patients revealed that significantly greater percentages of Black patients had a BMI ≥25.0 kg/m<sup>2</sup> (81.9 vs. 71.2%,  $P < 0.001$ ), a BMI ≥30.0 kg/m<sup>2</sup> (57.7 vs. 41.5%,  $P < 0.001$ ), an A1C >5.7% (75.7 vs. 69.7%,  $P = 0.022$ ), diabetes (27.7 vs. 19.9%,  $P < 0.001$ ), hypertension (17.7 vs. 9.5%,  $P < 0.001$ ), CKD (6.2 vs. 3.4%,  $P < 0.001$ ), and sleep apnea (2.1 vs. 0.7%,  $P < 0.001$ ). The data also suggested that a smaller proportion of Black patients in this population had COPD, CAD, and cirrhosis compared with White patients. Associations of demographics and comorbidities with race are shown in Table 2.

### Multivariate Regression Analysis of Patient Characteristics and Serious Outcomes

Multivariate logistic regression models were used to determine whether demographic and clinical factors were associated with the four outcomes (MV, ICU admission, death, and VTE). Each analysis was controlled for confounding variables, including age, sex, race, diabetes, BMI, and the eight additional comorbidities listed in STATISTICAL ANALYSIS. Results of multivariate regression analysis are shown in Table 3.

Age and male sex were significantly associated with all four outcomes. For age, odds ratios (ORs) indicated that for every 1-year increase in age, the odds of needing MV rose by a factor of 1.03 (95% CI 1.03–1.04,  $P < 0.0001$ ), being admitted to the ICU rose by a factor of 1.02 (95% CI 1.02–1.03,  $P < 0.0001$ ), dying rose by a factor of 1.08 (95% CI 1.07–1.09,  $P < 0.0001$ ), and developing VTE rose by a factor of 1.02 (95% CI 1.01–1.03;  $P < 0.0001$ ). Men were more likely to require MV (OR 2.02, 95% CI 1.70–2.41,  $P < 0.0001$ ), be admitted to the ICU (OR 1.82, 95% CI 1.56–2.13,  $P < 0.0001$ ), die (OR 1.82, 95% CI 1.52–2.19,  $P < 0.0001$ ), and develop VTE (OR 1.29, 95% CI 1.04–1.60,  $P = 0.0193$ ).

Black patients had significantly greater odds of MV (OR 1.44, 95% CI 1.13–1.83,  $P = 0.0009$ ) and ICU admission (OR 1.43, 95% CI 1.15–1.77,  $P = 0.0002$ ), but not VTE, than White patients. Black patients had significantly lower odds of death than White patients (OR 0.77, 95% CI 0.60–0.97,  $P = 0.0200$ ).

Diabetes was significantly associated with all four outcomes. The presence of diabetes was associated with

**TABLE 2** Associations of Demographics and Comorbidities With Race in Patients With COVID-19 (N = 7,495)

|                                                    | Black<br>(n = 4,447) | White<br>(n = 3,048) | P*     |
|----------------------------------------------------|----------------------|----------------------|--------|
| Age >50 years                                      | 2,556 (57.5)         | 1,846 (60.6)         | 0.008  |
| Male sex                                           | 1,824 (41.0)         | 1,369 (44.9)         | <0.001 |
| Diabetes                                           | 1,233 (27.7)         | 606 (19.9)           | <0.001 |
| Hypertension                                       | 786 (17.7)           | 291 (9.5)            | <0.001 |
| CKD                                                | 275 (6.2)            | 103 (3.4)            | <0.001 |
| Sleep apnea                                        | 95 (2.1)             | 21 (0.7)             | <0.001 |
| COPD                                               | 75 (1.7)             | 75 (2.5)             | 0.019  |
| CAD                                                | 146 (3.3)            | 152 (5.0)            | <0.001 |
| Stroke                                             | 58 (1.3)             | 36 (1.2)             | 0.638  |
| HF                                                 | 179 (4.0)            | 118 (3.9)            | 0.737  |
| Cirrhosis                                          | 10 (0.2)             | 20 (0.7)             | 0.004  |
| HIV                                                | 9 (0.2)              | 2 (0.1)              | 0.218  |
| Active malignancy                                  | 167 (3.8)            | 121 (4.0)            | 0.635  |
|                                                    | (n = 2,690)          | (n = 1,779)          |        |
| At least overweight (BMI ≥25.0 kg/m <sup>2</sup> ) | 2,202 (81.9)         | 1,267 (71.2)         | <0.001 |
| Obese (BMI ≥30.0 kg/m <sup>2</sup> )               | 1,553 (57.7)         | 739 (41.5)           | <0.001 |
|                                                    | (n = 950)            | (n = 399)            |        |
| A1C >5.7%                                          | 719 (75.7)           | 278 (69.7)           | 0.022  |

Data by racial group are n (%). \*Two-group comparisons were performed with  $\chi^2$  test (or Fisher's exact test when expected cell counts were <5) to determine associations between race/ethnicity (categorized in EMRs as Black or White) and each variable. Statistical significance is determined if  $P < 0.05$ .

MV (OR 2.0, 95% CI 1.68–2.38,  $P < 0.0001$ ), ICU admission (OR 2.01, 95% CI 1.72–2.36,  $P < 0.0001$ ), death (OR 1.50, 95% CI 1.25–1.80,  $P < 0.0001$ ), and VTE (OR 1.47, 95% CI 1.17–1.84,  $P = 0.0009$ ). A1C >5.7% was also significantly associated with MV (OR 1.97, 95% CI 1.28–3.05,  $P = 0.0022$ ) and ICU admission (OR 2.11, 95% CI 1.44–3.07,  $P = 0.0001$ ) but not death or VTE.

Weight categories of being at least overweight (BMI ≥25.0 kg/m<sup>2</sup>), obese (BMI ≥30.0 kg/m<sup>2</sup>), and obese relative to overweight (BMI 25.0–29.99 kg/m<sup>2</sup>) status were significantly associated with MV (OR 1.84, 95% CI 1.46–2.32,  $P < 0.0001$ ; OR 1.55, 95% CI 1.29–1.86,  $P < 0.0001$ ; and OR 1.31, 95% CI 1.07–1.61,  $P = 0.0096$ , respectively) and ICU admission (OR

1.34, 95% CI 1.10–1.63,  $P = 0.0036$ ; OR 1.40, 95% CI 1.19–1.65,  $P < 0.0001$ ; and OR 1.36, 95% CI 1.12–1.64,  $P = 0.0017$ , respectively). However, none of the weight categories were associated with death or VTE.

### Multivariate Regression Analysis of Inflammatory Markers and Serious Outcomes

Multivariate logistic regression models analyzed the presence of various inflammatory markers on the four outcomes in all patients, controlling for age, sex, race, diabetes, BMI, and the eight additional comorbidities listed in STATISTICAL ANALYSIS. Results of the multivariate logistic regression are in Table 4.

All inflammatory markers (D-dimer, ferritin, CRP, IL-6, and procalcitonin) were significantly correlated with

**TABLE 3** Multivariate Regression Analysis of Characteristics of Patients With COVID-19 and Serious Outcomes

| Variable                                                                                       | MV               |         |         | ICU Admission    |         |         | Death            |         |         | VTE              |         |         |
|------------------------------------------------------------------------------------------------|------------------|---------|---------|------------------|---------|---------|------------------|---------|---------|------------------|---------|---------|
|                                                                                                | OR (95% CI)      | P*      | P*      | OR (95% CI)      | P*      | P*      | OR (95% CI)      | P*      | P*      | OR (95% CI)      | P*      | P*      |
| Age, years                                                                                     | 1.03 (1.03-1.04) | <0.0001 | <0.0001 | 1.02 (1.02-1.03) | <0.0001 | <0.0001 | 1.08 (1.07-1.09) | <0.0001 | <0.0001 | 1.02 (1.01-1.03) | <0.0001 | <0.0001 |
| Male sex                                                                                       | 2.02 (1.70-2.41) | <0.0001 | <0.0001 | 1.82 (1.56-2.13) | <0.0001 | <0.0001 | 1.82 (1.52-2.19) | <0.0001 | <0.0001 | 1.29 (1.04-1.60) | 0.0193  | >0.99   |
| Black vs. White race                                                                           | 1.44 (1.13-1.83) | 0.0009  | 0.0009  | 1.43 (1.15-1.77) | 0.0002  | 0.0002  | 0.77 (0.60-0.97) | 0.0200  | 0.0200  | 0.95 (0.71-1.27) | >0.99   | >0.99   |
| Diabetes                                                                                       | 2.00 (1.68-2.38) | <0.0001 | <0.0001 | 2.01 (1.72-2.36) | <0.0001 | <0.0001 | 1.50 (1.25-1.80) | <0.0001 | <0.0001 | 1.47 (1.17-1.84) | 0.0009  | 0.0009  |
| At least overweight (BMI $\geq$ 25.0 kg/m <sup>2</sup> )                                       | 1.84 (1.46-2.32) | <0.0001 | <0.0001 | 1.34 (1.10-1.63) | 0.0036  | 0.0036  | 0.90 (0.74-1.11) | 0.3205  | 0.3205  | 0.91 (0.70-1.17) | 0.4450  | 0.4450  |
| Obese (BMI $\geq$ 30.0 kg/m <sup>2</sup> )                                                     | 1.55 (1.29-1.86) | <0.0001 | <0.0001 | 1.40 (1.19-1.65) | <0.0001 | <0.0001 | 1.09 (0.90-1.32) | 0.4010  | 0.4010  | 1.13 (0.90-1.41) | 0.3051  | 0.3051  |
| Obese (BMI $\geq$ 30.0 kg/m <sup>2</sup> ) vs. overweight (BMI 25.0-29.99 kg/m <sup>2</sup> )† | 1.31 (1.07-1.61) | 0.0096  | 0.0096  | 1.36 (1.12-1.64) | 0.0017  | 0.0017  | 1.17 (0.93-1.46) | 0.1843  | 0.1843  | 1.24 (0.94-1.62) | 0.127   | 0.127   |

\*Multivariate logistic regression controlled for age, sex, race, diabetes, BMI, hypertension, CKD, CAD, stroke, HF, COPD, sleep apnea, and active malignancy. Statistical significance was determined if  $P < 0.05$ . †Results for obese versus overweight represent the odds of the outcome for those who are obese (BMI  $\geq$ 30.0 kg/m<sup>2</sup>) relative to the odds of the outcome for those who are overweight (BMI 25.0-29.99 kg/m<sup>2</sup>).

risk of MV and death in all patients. All inflammatory markers except IL-6 were significantly correlated with ICU admission in all patients. D-dimer, CRP, and procalcitonin were associated with VTE in all patients, whereas IL-6 and ferritin were not.

## Discussion

This retrospective cohort study of patients hospitalized with COVID-19 within a large health system in metropolitan Detroit showed that older age, male sex, Black race, diabetes, elevated BMI, and elevated inflammatory markers were correlated with critical illness in COVID-19. Older age, male sex, diabetes, and inflammatory markers, but not elevated BMI, were associated with mortality. Despite having greater odds of critical illness, Black patients had lower odds of death than White patients. Older age, male sex, diabetes, and elevated inflammatory markers were significantly associated with VTE.

### Incidence of Poor Outcomes From COVID-19

Fewer than 10% of our study population was found to require MV or ICU admission, to be diagnosed with VTE, or to die. In contrast, the Centers for Disease Control and Prevention (CDC) estimated that 12% (age <50 years) to 21.6% (age >50 years) of patients with COVID-19 needed MV, 23.8% (age <50 years) to 35.7% (age >50 years) required ICU admission, and 2.4% (age <50 years) to 18.3% (age >50 years) died (3). Overall, VTE incidence is estimated to be 21% (6). The incidence of poor outcomes was lower than CDC estimates in our study, possibly because of earlier intervention with more effective therapies, the large proportion of patients <50 years of age, and effective transition of care from in-person to virtual. Our study included patients who were admitted a few months into the pandemic, when rapidly evolving treatment algorithms started to include regular use of corticosteroids, prone positioning in the ICU, anticoagulation therapy, and use of remdesivir. A large proportion (40%) of our study population was relatively young (<50 years of age), which may partially explain the lower incidence of severe outcomes. HFHS also has a well-established EMR system and had been offering virtual visits before the pandemic, resulting in a smooth and immediate transition to virtual outpatient visits and continued access to health care when the pandemic began, possibly contributing to improved management of comorbid conditions and lower incidence of poor outcomes.

**TABLE 4** Multivariate Regression Analysis of Inflammatory Markers in Patients With COVID-19 and Serious Outcomes

| Outcome       | Inflammatory Marker | Unit Change | OR (95% CI)      | P       |
|---------------|---------------------|-------------|------------------|---------|
| MV            | D-Dimer             | 1           | 1.06 (1.04-1.08) | <0.0001 |
|               | Ferritin            | 100         | 1.02 (1.01-1.02) | <0.0001 |
|               | CRP                 | 1           | 1.07 (1.06-1.08) | <0.0001 |
|               | IL-6                | 10          | 1.02 (1.01-1.03) | 0.0021  |
|               | Procalcitonin       | 1           | 1.03 (1.01-1.04) | <0.0001 |
| ICU admission | D-Dimer             | 1           | 1.07 (1.05-1.08) | <0.0001 |
|               | Ferritin            | 100         | 1.01 (1.01-1.02) | <0.0001 |
|               | CRP                 | 1           | 1.06 (1.05-1.07) | <0.0001 |
|               | IL-6                | 10          | 1.01 (1.00-1.02) | 0.2506  |
|               | Procalcitonin       | 1           | 1.02 (1.01-1.03) | 0.0003  |
| Death         | D-Dimer             | 1           | 1.06 (1.04-1.07) | <0.0001 |
|               | Ferritin            | 100         | 1.01 (1.01-1.02) | <0.0001 |
|               | CRP                 | 1           | 1.05 (1.04-1.07) | <0.0001 |
|               | IL-6                | 10          | 1.01 (1.00-1.02) | 0.0067  |
|               | Procalcitonin       | 1           | 1.04 (1.03-1.05) | <0.0001 |
| VTE           | D-Dimer             | 1           | 1.10 (1.08-1.12) | <0.0001 |
|               | Ferritin            | 100         | 1.00 (0.99-1.01) | 0.3518  |
|               | CRP                 | 1           | 1.02 (1.01-1.03) | 0.0094  |
|               | IL-6                | 10          | 1.00 (1.00-1.00) | 0.7546  |
|               | Procalcitonin       | 1           | 1.01 (1.00-1.03) | 0.0201  |

Multivariate logistic regression models evaluated whether inflammatory markers (D-dimer, ferritin, CRP, IL-6, and procalcitonin) were associated with each outcome while controlling for age, sex, race, diabetes, BMI, hypertension, CKD, CAD, stroke, HF, COPD, sleep apnea, and active malignancy. In cases with multiple values for the same inflammatory marker during the hospital stay, the earliest value was used. If the inflammatory marker was measured multiple times on the earliest day, then the average value on the earliest day was used. Statistical significance was determined if  $P < 0.05$ .

### Age and Outcomes From COVID-19

CDC data show that the risk of hospitalization and death from COVID-19 increases with age, starting even at 18 years of age, and that a striking increase in risk starts in the 65- to 74-year age range, with the highest risk noted for those  $\geq 85$  years of age (up to 8,700-fold higher risk) (7). Our data revealed increased odds of MV and ICU admission, death, and VTE per age year, corroborating the CDC data analysis and findings from studies reporting older age to be associated with higher risk of hospital admission (8,9), higher mortality (10-15), and risk of MV (11,16).

Comparisons between studies is difficult because of the heterogeneity of age categories and outcomes studied. Many studies adjusted for some confounders in their analyses, but usually fewer than in our study, perhaps resulting in the lower ORs we observed (1.03-1.08) relative to other studies in similar health care settings with

a similar patient population (1.73-5.3) (11,15,17). The only meta-analysis specifically evaluating the effect of age on outcomes included 12 studies, all from China, and emphasized the importance of adjusting for confounders. These authors found significant bias in results and a marked decrease in the influence of age on COVID-19 disease severity and mortality after adjustment for important age-related risk factors (18). We controlled for 13 risk factors and still found a significant association of increasing age with severe disease and mortality.

The etiology of an age-related effect on poor outcomes in patients with COVID-19 has been described to be related to increasing baseline inflammation, possibly resulting from increasing levels of senescent cells with age. Senescent cells can activate endothelial cells lining capillaries in the lungs and increase expression of natural killer cell receptor ligands that recruit natural killer-

like T cells, which cause collateral lung destruction (19).

### *Male Sex and Outcomes From COVID-19*

Male sex has been associated with higher risks of hospital admission and critical illness from COVID-19 (1.3–2 times greater) (8,13,20–22), as well as higher case fatality rate (1.46–1.7 times greater) than for women (16,20–25). Our results similarly found that male sex, controlling for multiple confounders, was significantly associated with all four severe outcomes (ORs 1.29–2.02).

Male predominance of deaths was also observed in previous epidemics from SARS-CoV and Middle East respiratory syndrome (26–28). Postulated underlying etiologies include sex-biased expression of the virus entry receptor angiotensin-converting enzyme 2 (ACE2) and regulation of cellular transmembrane serine protease 2 (the enzyme that primes the spike protein of the virus), which could increase the susceptibility of men to SARS-CoV-2 compared with women (25). Furthermore, differences based on sex may exist in innate immunity, possibly related to the location of immune regulatory genes on the second X chromosome and higher CD4+ lymphocytes (and therefore better viral clearance), higher antibody production, higher protective levels of estrogen, and lower production of inflammatory IL-6 in women compared with men (29).

### *Black Race and Outcomes From COVID-19*

The literature to date provides strong evidence that Black patients have higher incidences of SARS-CoV-2 infection and hospitalization for COVID-19 compared with White patients. Data on severe outcomes and mortality in Black compared with White patients are less clear; some studies and meta-analyses have found an association of Black race with more severe disease (MV) (14) and COVID-19–related death (13,30–32) compared with White race, whereas other studies have not found any differences (14,33–35).

Our study includes a large percentage of Black patients (50%), consistent with the large Black population in Detroit (78.3%) (36). Our results suggested a significant association of Black race with critical illness, but not increased mortality, relative to White patients, adding to the mixed findings in the literature on this topic. The lack of association of Black race with higher mortality is similar to findings from three studies that had similar geographic and racial demographics to our study

(56–72% Black patients in the Detroit metropolitan area) (15,17,37). In fact, our data suggested that Black patients had significantly lower odds of death than White patients, similar to results of a smaller study conducted at HFHS by Miller et al. (37).

In contrast to other studies, our study also looked at specific differences in the presence of comorbid conditions in Black compared with White patients, finding that Black patients had a significantly higher prevalence of elevated BMI, A1C >5.7%, diabetes, hypertension, CKD, and sleep apnea than White patients. Because we controlled for a variety of comorbidities and other variables (age, sex, race, diabetes, and BMI), the association between Black race and greater odds of critical illness relative to White race may be explained by other variables such as lower socioeconomic status and decreased access to health care or health insurance. We did not evaluate for these factors, but based on 2019 U.S. Census Bureau data for Detroit, 35% of people in this majority Black city are in poverty, and 9.6% of the population do not have health insurance (36), suggesting that socioeconomic hardships are prevalent and likely to contribute to poor health and outcomes.

### *Diabetes and Outcomes From COVID-19*

High prevalence rates of diabetes (22–38.4%) have been found in patients hospitalized for COVID-19 in the United States and other countries (8,15,17,37–41), and meta-analyses have demonstrated that the prevalence of diabetes is higher in patients with more severe COVID-19 (42). Our study cohort had a similar diabetes prevalence (23.6%). Prevalence of A1C >5.7% in our study population was even higher (74.3%) among the 1,532 patients who had A1C measured. Reported rates of diabetes and prediabetes in the general U.S. population (10.5 and 34.5%, respectively) are lower than in studies of patients with COVID-19 (43), pointing to a likely relationship between diabetes and prediabetes and severe COVID-19.

The association of diabetes with critical illness and mortality in our study (ORs 1–2) is similar to reports in the literature of a 1.5- to 4.6-fold higher risk of mortality and a 2- to 2.7-fold higher risk of severe disease in patients with COVID-19 and diabetes than in COVID-19 patients without diabetes (10,40,44–52). Our results are consistent with those of previous smaller studies of shorter duration conducted in our health system (17,37). The results from a well-cited multicenter study of patients with diabetes who were hospitalized with COVID-19 in France did not find glycemic control to be

an independent predictor of mortality, which contrasts with our study and with published meta-analyses, but 20.3% required MV and 10.6% died as early as 7 days after admission, still suggesting an association of diabetes with poor outcomes (53).

Less has been published on prediabetes (A1C 5.7 to <6.5%) or A1C  $\geq$ 5.7% and outcomes in COVID-19. Smaller studies with 184–453 patients found an association of prediabetes with MV, ICU admission, and mortality (54–56) and an association of A1C  $\geq$ 5.7%, with higher markers of inflammation and coagulability and lower oxygen saturation (57). The presence of A1C >5.7% in our cohort was found to be associated with MV and ICU admission, but not death. A possible explanation for why elevated A1C was not found to be associated with mortality is that A1C cannot evaluate for glycemic variability and higher glucose levels seen during acute illness, both of which are known to contribute to poor outcomes. Elevated fasting plasma glucose levels have been found to be a better predictor of infection severity and mortality than A1C in COVID-19 patients (55). Comparing studies is difficult because of differences in A1C categories and cutoffs and measured outcomes. Our study differs from previous ones by its inclusion of a larger patient cohort (1,532 patients) who had A1C measured.

Postulated reasons for poor outcomes in COVID-19 in patients with elevated A1C and diabetes include the associations of diabetes with older age, other comorbidities, chronic inflammation, higher inflammatory markers, and a prothrombotic state (10,44,48). Higher levels of inflammation-related biomarkers (IL-6, erythrocyte sedimentation rate, CRP, serum ferritin, D-dimer, and fibrinogen) found in patients with COVID-19 and diabetes (58,59) may predispose to an inflammatory cytokine storm, impaired T-cell responses, lung injury, and possibly increased infectivity related to abnormal ACE2 expression and increased furin, all of which are potential underlying mechanisms of more severe COVID-19 in diabetes (60,61).

Our findings provide evidence to support greater diabetes screening and use of A1C to detect and allow earlier treatment of prediabetes and diabetes during the COVID-19 pandemic to prevent poor outcomes.

### BMI and Outcomes From COVID-19

Studies of COVID-19 have described a prevalence of obesity in patients that ranges from 16.3% in Italy to

57.6% in Detroit (8,17,37–39,62–64). Higher obesity prevalence rates have been found in U.S. studies, especially in Detroit (17,37), as reported in our study, with 50.3% of patients in the obese range. Higher obesity prevalence in hospitalized COVID-19 patients than in the general U.S. and Michigan populations (42.4 and 36% in 2017–2018, respectively) (65) suggests an association of obesity with more severe disease. On the other hand, the prevalence of being merely overweight in hospitalized COVID-19 patients (21–37% in various studies; 27.5% in our study cohort) (8,53,66,67) has not been found to be much higher than the general population (31.1% in the United States in 2017–2018 [68] and 34.9% in Michigan in 2014 [69]).

Our results demonstrated that obesity and elevated BMI starting even at  $\geq$ 25.0 kg/m<sup>2</sup> (overweight levels) were significantly associated with the need for MV and ICU admission, but not with death or VTE. Most published reports support the association of obesity with critical illness (MV, ICU admission, and acute respiratory distress syndrome) (8,39,40,53,67,70–74), but the association of being overweight with critical illness is less consistent, with only some studies finding a relationship of being overweight with MV (53,66), but not others (8,67,75). The relationship of higher BMI and death in COVID-19 patients is also not clear. Most studies, including a meta-analysis of 33 studies on obesity and COVID-19, the CORONADO (Coronavirus SARS-CoV-2 and Diabetes Outcomes) study of patients with diabetes and COVID-19, a recent Chinese study, and two large studies from New York, found an association of obesity with higher risk of death (8,53,66,67,70); however, several U.S. studies did not find obesity to be associated with mortality from COVID-19 (15,37,39,40). Being overweight was not found to be associated with higher risk of death in the few studies evaluating this weight category (8,66,67). Our results add to this variable literature, supporting the findings that obesity and elevated BMI starting even at the overweight category are associated with critical illness but not death. More research on the effects of weight and BMI on COVID-19 mortality needs to be done.

Molecular mechanisms linking obesity with poor prognosis from COVID-19 include 1) alteration in adipose tissue resulting in a proinflammatory state with increased secretion of cytokines (monocyte chemoattractant protein-1, tumor necrosis factor- $\alpha$ , IL-1 $\beta$ , IL-6, and interferon- $\gamma$ ), contributing to risk of cytokine storm; 2) upregulation of ACE2, the functional receptor for SARS-CoV-2, and dipeptidyl peptidase 4, another



potential SARS-CoV-2 receptor, facilitating virus entry and a severe inflammatory and immune response; and 3) expression of furin, a priming protease for SARS-CoV-2 in vascular endothelial cells, which may contribute to inflammation, damage to vascular endothelium, and coagulopathy (76). Also, obesity negatively affects lung function through mechanical/restrictive means and excess inflammation (76).

### Inflammatory Markers and Outcomes From COVID-19

Many studies, including several meta-analyses, have shown a relationship between higher levels of proinflammatory markers such as CRP, IL-6, erythrocyte sedimentation rate, procalcitonin, ferritin, and D-dimer and more severe disease and mortality from COVID-19 (8,39,44,77–83). However, not all studies have shown a strong correlation between inflammatory markers and clinical outcomes in COVID-19 (84,85). Our results added to the literature supporting the inflammatory state as a major mechanism of severe COVID-19.

### Limitations

Our study has several limitations, including its retrospective design. The study population included only patients hospitalized for COVID-19 in one health care system. This cohort may have had additional risk factors for admission that were not measured in this study, such as socioeconomic status or work and home situations, all of which may contribute to severity of illness. Because patients admitted to the hospital tend to be sicker and to have comorbidities, the cohort may not be representative of the general population. Because data collected on patient clinical variables was based on *International Classification of Diseases*, 10th revision, diagnosis codes, some diagnoses may have been missed if the diagnosis or code was not entered for a patient. Data on BMI and A1C were not present for all patients, although we still had >5,000 patients with BMI recorded and >1,500 with A1C results. We used diagnosis of diabetes instead of elevated A1C, as this method captured more patients with diabetes. Analysis by A1C should be further investigated in large observational studies because of the potential for gathering incomplete data and potential skewing of results, since A1C tends to be measured only in those predicted to have high levels.

### Conclusion

This large retrospective study identified older age, male sex, Black race, diabetes, elevated BMI, and elevated

inflammatory markers as potential risk factors for severe COVID-19. Our findings emphasize the need to 1) better identify patients with prediabetes and diabetes through screening with A1C, 2) check for elevated BMI in all patients, and 3) more aggressively address and treat these conditions to reduce risk. The urgency to identify and address diabetes and elevated BMI during and after the pandemic is evident from data indicating that 42% of adults gained almost 30 lb, and almost half delayed or canceled health care services during the pandemic (86). Recently published recommendations for the management of diabetes and obesity during COVID-19 can help providers mitigate risk (87,88). Furthermore, our results indicate a need to work to reduce disparities in health care for Black patients. Increasing the use of telemedicine may help to improve health care equity and reduce barriers. Vaccinations are also now widely available and should be encouraged for those at risk for severe COVID-19, given current lack of definitive treatment for this new infectious disease.

### ACKNOWLEDGMENTS

The authors thank Karla Passalacqua, PhD, of Henry Ford Hospital for her editorial assistance with the manuscript.

### DUALITY OF INTEREST

No potential conflicts of interest relevant to this article were reported.

### AUTHOR CONTRIBUTIONS

J.H. researched the data, contributed to writing the manuscript, and reviewed the manuscript. E.T. contributed to the statistical analysis of the data and reviewed and edited the manuscript. S.W.L. researched the data, wrote the manuscript, and reviewed and edited the manuscript. S.W.L. is the guarantor of this work and, as such, had full access to all the data in the study and take responsibility for the integrity of the data and the accuracy of the data analysis.

### REFERENCES

1. Johns Hopkins University and Medicine. Coronavirus resource center. Available from <https://coronavirus.jhu.edu>. Accessed 11 June 2021
2. Cutler DM, Summers LH. The COVID-19 pandemic and the \$16 trillion virus. *JAMA* 2020;324:1495–1496
3. Centers for Disease Control and Prevention. COVID-19 pandemic planning scenarios. Available from <https://www.cdc.gov/coronavirus/2019-ncov/hcp/planning-scenarios.html>. Accessed 22 October 2020
4. Zheng Z, Peng F, Xu B, et al. Risk factors of critical & mortal COVID-19 cases: a systematic literature review and meta-analysis. *J Infect* 2020;81:e16–e25

5. Centers for Disease Control and Prevention. Post-COVID conditions: information for healthcare providers. Available from <https://www.cdc.gov/coronavirus/2019-ncov/hcp/clinical-care/late-sequelae.html>. Accessed 11 March 2021
6. Malas MB, Naazie IN, Elsayed N, Mathlouthi A, Marmor R, Clary B. Thromboembolism risk of COVID-19 is high and associated with a higher risk of mortality: a systematic review and meta-analysis. *EClinicalMedicine* 2020; 29:100639
7. Centers for Disease Control and Prevention. Risk for COVID-19 infection, hospitalization, and death by age group. Available from <https://www.cdc.gov/coronavirus/2019-ncov/covid-data/investigations-discovery/hospitalization-death-by-age.html>. Accessed 23 May 2021
8. Petrilli CM, Jones SA, Yang J, et al. Factors associated with hospital admission and critical illness among 5279 people with coronavirus disease 2019 in New York City: prospective cohort study. *BMJ* 2020;369:m1966
9. Gottlieb M, Sansom S, Frankenberger C, Ward E, Hota B. Clinical course and factors associated with hospitalization and critical illness among COVID-19 patients in Chicago, Illinois. *Acad Emerg Med* 2020;27:963-973
10. Zhou F, Yu T, Du R, et al. Clinical course and risk factors for mortality of adult inpatients with COVID-19 in Wuhan, China: a retrospective cohort study. *Lancet* 2020;395:1054-1062
11. Palaodimos L, Kokkinidis DG, Li W, et al. Severe obesity, increasing age and male sex are independently associated with worse in-hospital outcomes, and higher in-hospital mortality, in a cohort of patients with COVID-19 in the Bronx, New York. *Metabolism* 2020;108:154262
12. Fox T, Ruddiman K, Lo KB, et al. The relationship between diabetes and clinical outcomes in COVID-19: a single-center retrospective analysis. *Acta Diabetol* 2021;58:33-38
13. Williamson EJ, Walker AJ, Bhaskaran K, et al. Factors associated with COVID-19-related death using OpenSAFELY. *Nature* 2020;584:430-436
14. Ioannou GN, Locke E, Green P, et al. Risk factors for hospitalization, mechanical ventilation, or death among 10 131 US veterans with SARS-CoV-2 infection. *JAMA Netw Open* 2020;3:e2022310
15. Imam Z, Odish F, Gill I, et al. Older age and comorbidity are independent mortality predictors in a large cohort of 1305 COVID-19 patients in Michigan, United States. *J Intern Med* 2020;288:469-476
16. Fried MW, Crawford JM, Mospan AR, et al. Patient characteristics and outcomes of 11 721 patients with coronavirus disease 2019 [COVID-19] hospitalized across the United States. *Clin Infect Dis* 2021;72:e558-e565
17. Suleyman G, Fadel RA, Malette KM, et al. Clinical characteristics and morbidity associated with coronavirus disease 2019 in a series of patients in Metropolitan Detroit. *JAMA Netw Open* 2020;3:e2012270
18. Romero Starke K, Petereit-Haack G, Schubert M, et al. The age-related risk of severe outcomes due to COVID-19 infection: a rapid review, meta-analysis, and meta-regression. *Int J Environ Res Public Health* 2020;17:5974
19. Akbar AN, Gilroy DW. Aging immunity may exacerbate COVID-19. *Science* 2020;369:256-257
20. Gebhard C, Regitz-Zagrosek V, Neuhauser HK, Morgan R, Klein SL. Impact of sex and gender on COVID-19 outcomes in Europe. *Biol Sex Differ* 2020;11:29
21. Galbadage T, Peterson BM, Awada J, et al. Systematic review and meta-analysis of sex-specific COVID-19 clinical outcomes. *Front Med (Lausanne)* 2020;7:348
22. Ortolan A, Lorenzin M, Felicetti M, Doria A, Ramonda R. Does gender influence clinical expression and disease outcomes in COVID-19? A systematic review and meta-analysis. *Int J Infect Dis* 2020;99:496-504
23. Dudley JP, Lee NT. Disparities in age-specific morbidity and mortality from SARS-CoV-2 in China and the Republic of Korea. *Clin Infect Dis* 2020;71:863-865
24. Jin JM, Bai P, He W, et al. Gender differences in patients with COVID-19: focus on severity and mortality. *Front Public Health* 2020;8:152
25. Scully EP, Haverfield J, Ursin RL, Tannenbaum C, Klein SL. Considering how biological sex impacts immune responses and COVID-19 outcomes. *Nat Rev Immunol* 2020;20:442-447
26. Karlberg J, Chong DS, Lai WY. Do men have a higher case fatality rate of severe acute respiratory syndrome than women do? *Am J Epidemiol* 2004;159:229-231
27. Leong HN, Earnest A, Lim HH, et al. SARS in Singapore: predictors of disease severity. *Ann Acad Med Singap* 2006;35:326-331
28. Alghamdi IG, Hussain II, Almalki SS, Alghamdi MS, Alghamdi MM, El-Sheemy MA. The pattern of Middle East Respiratory Syndrome coronavirus in Saudi Arabia: a descriptive epidemiological analysis of data from the Saudi Ministry of Health. *Int J Gen Med* 2014;7:417-423
29. Conti P, Younes A. Coronavirus COV-19/SARS-CoV-2 affects women less than men: clinical response to viral infection. *J Biol Regul Homeost Agents* 2020;34:339-343
30. Golestaneh L, Neugarten J, Fisher M, et al. The association of race and COVID-19 mortality. *EClinicalMedicine* 2020;25:100455
31. El Chaar M, King K, Galvez Lima A. Are black and Hispanic persons disproportionately affected by COVID-19 because of higher obesity rates? *Surg Obes Relat Dis* 2020; 16:1096-1099
32. Mackey K, Ayers CK, Kondo KK, et al. Racial and ethnic disparities in COVID-19-related infections, hospitalizations, and deaths: a systematic review. *Ann Intern Med* 2021; 174:362-373
33. Price-Haywood EG, Burton J, Fort D, Seoane L. Hospitalization and mortality among black patients and white patients with Covid-19. *N Engl J Med* 2020;382: 2534-2543
34. Yehia BR, Winegar A, Fogel R, et al. Association of race with mortality among patients hospitalized with coronavirus

- disease 2019 (COVID-19) at 92 US hospitals. *JAMA Netw Open* 2020;3:e2018039
35. Sze S, Pan D, Nevill CR, et al. Ethnicity and clinical outcomes in COVID-19: a systematic review and meta-analysis. *EClinicalMedicine* 2020;29:100630
36. U.S. Census Bureau. Quickfacts: Detroit city, Michigan. Available from <https://www.census.gov/quickfacts/fact/table/detroitcitymichigan,waynecountymichigan/PST045219>. Accessed 19 December 2020
37. Miller J, Fadel RA, Tang A, et al. The impact of sociodemographic factors, comorbidities, and physiologic responses on 30-day mortality in coronavirus disease 2019 (COVID-19) patients in Metropolitan Detroit. *Clin Infect Dis* 2021;72:e704–e710
38. Goyal P, Choi JJ, Pinheiro LC, et al. Clinical characteristics of Covid-19 in New York City. *N Engl J Med* 2020;382:2372–2374
39. Cummings MJ, Baldwin MR, Abrams D, et al. Epidemiology, clinical course, and outcomes of critically ill adults with COVID-19 in New York City: a prospective cohort study. *Lancet* 2020;395:1763–1770
40. Seiglie J, Platt J, Cromer SJ, et al. Diabetes as a risk factor for poor early outcomes in patients hospitalized with COVID-19. *Diabetes Care* 2020;43:2938–2944
41. Fadini GP, Morieri ML, Longato E, Avogaro A. Prevalence and impact of diabetes among people infected with SARS-CoV-2. *J Endocrinol Invest* 2020;43:867–869
42. Wang X, Wang S, Sun L, Qin G. Prevalence of diabetes mellitus in 2019 novel coronavirus: a meta-analysis. *Diabetes Res Clin Pract* 2020;164:108200
43. Centers for Disease Control and Prevention. *National Diabetes Statistics Report 2020: Estimates of Diabetes and Its Burden in the United States*. Available from <https://www.cdc.gov/diabetes/pdfs/data/statistics/national-diabetes-statistics-report.pdf>. Accessed 27 December 2020
44. Apicella M, Campopiano MC, Mantuano M, Mazoni L, Coppelli A, Del Prato S. COVID-19 in people with diabetes: understanding the reasons for worse outcomes. *Lancet Diabetes Endocrinol* 2020;8:782–792
45. Kumar A, Arora A, Sharma P, et al. Is diabetes mellitus associated with mortality and severity of COVID-19? A meta-analysis. *Diabetes Metab Syndr* 2020;14:535–545
46. Guan WJ, Liang WH, Zhao Y, et al.; China Medical Treatment Expert Group for COVID-19. Comorbidity and its impact on 1590 patients with COVID-19 in China: a nationwide analysis. *Eur Respir J* 2020;55:2000547
47. Roncon L, Zuin M, Rigatelli G, Zuliani G. Diabetic patients with COVID-19 infection are at higher risk of ICU admission and poor short-term outcome. *J Clin Virol* 2020;127:104354
48. Zhang Y, Cui Y, Shen M, et al.; Medical Team from Xiangya Hospital to Support Hubei, China. Association of diabetes mellitus with disease severity and prognosis in COVID-19: a retrospective cohort study. *Diabetes Res Clin Pract* 2020;165:108227
49. Yan Y, Yang Y, Wang F, et al. Clinical characteristics and outcomes of patients with severe covid-19 with diabetes. *BMJ Open Diabetes Res Care* 2020;8:e001343
50. Shang L, Shao M, Guo Q, et al. Diabetes mellitus is associated with severe infection and mortality in patients with COVID-19: a systematic review and meta-analysis. *Arch Med Res* 2020;51:700–709
51. Guo L, Shi Z, Zhang Y, et al. Comorbid diabetes and the risk of disease severity or death among 8807 COVID-19 patients in China: a meta-analysis. *Diabetes Res Clin Pract* 2020;166:108346
52. Bode B, Garrett V, Messler J, et al. Glycemic characteristics and clinical outcomes of COVID-19 patients hospitalized in the United States. *J Diabetes Sci Technol* 2020;14:813–821
53. Smati S, Tramunt B, Wargny M, et al.; CORONADO investigators. Relationship between obesity and severe COVID-19 outcomes in patients with type 2 diabetes: results from the CORONADO study. *Diabetes Obes Metab* 2021;23:391–403
54. Smith SM, Boppana A, Traupman JA, et al. Impaired glucose metabolism in patients with diabetes, prediabetes, and obesity is associated with severe COVID-19. *J Med Virol* 2021;93:409–415
55. Vargas-Vázquez A, Bello-Chavolla OY, Ortiz-Brizuela E, et al. Impact of undiagnosed type 2 diabetes and pre-diabetes on severity and mortality for SARS-CoV-2 infection. *BMJ Open Diabetes Res Care* 2021;9:e002026
56. Li H, Tian S, Chen T, et al. Newly diagnosed diabetes is associated with a higher risk of mortality than known diabetes in hospitalized patients with COVID-19. *Diabetes Obes Metab* 2020;22:1897–1906
57. Wang Z, Du Z, Zhu F. Glycosylated hemoglobin is associated with systemic inflammation, hypercoagulability, and prognosis of COVID-19 patients. *Diabetes Res Clin Pract* 2020;164:108214
58. Guo W, Li M, Dong Y, et al. Diabetes is a risk factor for the progression and prognosis of COVID-19. *Diabetes Metab Res Rev* 2020;36:e3319
59. Bello-Chavolla OY, Bahena-Lopez JP, Antonio-Villa NE, et al. Predicting mortality due to SARS-CoV-2: a mechanistic score relating obesity and diabetes to COVID-19 outcomes in Mexico. *J Clin Endocrinol Metab* 2020;105:dga346
60. Zhou Y, Chi J, Lv W, Wang Y. Obesity and diabetes as high-risk factors for severe coronavirus disease 2019 (COVID-19). *Diabetes Metab Res Rev* 2021;37:e3377
61. Singh AK, Gupta R, Ghosh A, Misra A. Diabetes in COVID-19: prevalence, pathophysiology, prognosis and practical considerations. *Diabetes Metab Syndr* 2020;14:303–310
62. Giacomelli A, Ridolfo AL, Milazzo L, et al. 30-Day mortality in patients hospitalized with COVID-19 during the first wave of the Italian epidemic: a prospective cohort study. *Pharmacol Res* 2020;158:104931

63. Rottoli M, Bernante P, Belvedere A, et al. How important is obesity as a risk factor for respiratory failure, intensive care admission and death in hospitalised COVID-19 patients? Results from a single Italian centre. *Eur J Endocrinol* 2020;183:389–397
64. Organisation for Economic Co-operation and Development. Obesity and the economics of prevention: fit not fat key facts—Italy, update 2014. Available from <https://www.oecd.org/italy/Obesity-Update-2014-ITALY.pdf>. Accessed 27 December 2020
65. Hales CM, Carroll MD, Fryar CD, Ogden CL. Prevalence of obesity and severe obesity among adults: United States, 2017–2018. *NCHS Data Brief* 2020;360:1–8
66. Kim TS, Roslin M, Wang JJ, Kane J, Hirsch JS; Northwell Health COVID-19 Research Consortium. BMI as a risk factor for clinical outcomes in patients hospitalized with COVID-19 in New York. *Obesity (Silver Spring)* 2021;29:279–284
67. Wu X, Li C, Chen S, et al. Association of body mass index with severity and mortality of COVID-19 pneumonia: a two-center, retrospective cohort study from Wuhan, China. *Aging (Albany NY)* 2021;13:7767–7780
68. Fryar CD, Carroll MD, Afful J. Prevalence of overweight, obesity, and severe obesity among adults aged 20 and over: United States, 1960–1962 through 2017–2018. Available from <https://www.cdc.gov/nchs/data/hestat/obesity-adult-17-18/overweight-obesity-adults-H.pdf>. Accessed 3 June 2021
69. Byrd HCM, Fussman C, Wahl R, Lyon-Callo S, Imes G. Overweight and obesity in Michigan: surveillance update 2016. Available from [https://www.michigan.gov/documents/mdhhs/2016\\_Surveillance\\_Update\\_534840\\_7.pdf](https://www.michigan.gov/documents/mdhhs/2016_Surveillance_Update_534840_7.pdf). Accessed 3 June 2021
70. Huang Y, Lu Y, Huang YM, et al. Obesity in patients with COVID-19: a systematic review and meta-analysis. *Metabolism* 2020;113:154378
71. Földi M, Farkas N, Kiss S, et al.; KETLAK Study Group. Obesity is a risk factor for developing critical condition in COVID-19 patients: a systematic review and meta-analysis. *Obes Rev* 2020;21:e13095
72. Zhou Y, Yang Q, Chi J, et al. Comorbidities and the risk of severe or fatal outcomes associated with coronavirus disease 2019: a systematic review and meta-analysis. *Int J Infect Dis* 2020;99:47–56
73. Chu Y, Yang J, Shi J, Zhang P, Wang X. Obesity is associated with increased severity of disease in COVID-19 pneumonia: a systematic review and meta-analysis. *Eur J Med Res* 2020;25:64
74. Peres KC, Riera R, Martimbianco ALC, Ward LS, Cunha LL. Body mass index and prognosis of COVID-19 infection: a systematic review. *Front Endocrinol (Lausanne)* 2020;11:562
75. Simonnet A, Chetboun M, Poissy J, et al.; LICORN and the Lille COVID-19 and Obesity study group. High prevalence of obesity in severe acute respiratory syndrome coronavirus-2 (SARS-CoV-2) requiring invasive mechanical ventilation. *Obesity (Silver Spring)* 2020;28:1195–1199
76. Ritter A, Kreis NN, Louwen F, Yuan J. Obesity and COVID-19: molecular mechanisms linking both pandemics. *Int J Mol Sci* 2020;21:5793
77. Liu F, Li L, Xu M, et al. Prognostic value of interleukin-6, C-reactive protein, and procalcitonin in patients with COVID-19. *J Clin Virol* 2020;127:104370
78. Del Valle DM, Kim-Schulze S, Hsin-Hui H, et al. An inflammatory cytokine signature helps predict COVID-19 severity and death. *medRxiv*. 30 May 2020 [preprint]. (doi: 10.1101/2020.05.28.20115758)
79. Mani VR, Kalabin A, Valdivieso SC, Murray-Ramcharan M, Donaldson B. New York inner city hospital COVID-19 experience and current data: retrospective analysis at the epicenter of the American coronavirus outbreak. *J Med Internet Res* 2020;22:e20548
80. Paranjpe I, Russak AJ, De Freitas JK, et al.; Mount Sinai COVID Informatics Center (MSCIC). Retrospective cohort study of clinical characteristics of 2199 hospitalised patients with COVID-19 in New York City. *BMJ Open* 2020;10:e040736
81. Feng X, Li S, Sun Q, et al. Immune-inflammatory parameters in COVID-19 cases: a systematic review and meta-analysis. *Front Med (Lausanne)* 2020;7:301
82. Zhu Z, Hasegawa K, Ma B, Fujiogi M, Camargo CA Jr, Liang L. Association of obesity and its genetic predisposition with the risk of severe COVID-19: analysis of population-based cohort data. *Metabolism* 2020;112:154345
83. Zeng F, Huang Y, Guo Y, et al. Association of inflammatory markers with the severity of COVID-19: a meta-analysis. *Int J Infect Dis* 2020;96:467–474
84. Leisman DE, Ronner L, Pinotti R, et al. Cytokine elevation in severe and critical COVID-19: a rapid systematic review, meta-analysis, and comparison with other inflammatory syndromes. *Lancet Respir Med* 2020;8:1233–1244
85. Barrett B, Pamphile S, Yang F, et al. Inflammatory markers are poorly predictive of clinical outcomes among hospitalized patients with COVID-19. *Am J Emerg Med* 2021;46:595–598
86. American Psychological Association. *Stress in America: One Year Later, A New Wave of Pandemic Health Concerns*. Available from <https://www.apa.org/news/press/releases/stress/2021/sia-pandemic-report.pdf>. Accessed 29 July 2021
87. Bornstein SR, Rubino F, Khunti K, et al. Practical recommendations for the management of diabetes in patients with COVID-19. *Lancet Diabetes Endocrinol* 2020;8:546–550
88. Mulugeta WM. Obesity management in primary care during and beyond the COVID-19 pandemic. *J Nurse Pract* 2021;17:428–431
